# Supplementary material
Source: PubMed Central journal article supplement (PMC4695325)

1 **Supplement**

2  
3 Endogenous secreted phospholipase A<sub>2</sub> group X regulates cysteinyl leukotrienes synthesis by  
4 human eosinophils

5  
6 Teal S. Hallstrand,<sup>1</sup> Ying Lai,<sup>1</sup> Kathryn A Hooper,<sup>2</sup> Rob C. Oslund,<sup>3</sup> William A. Altemeier,<sup>1</sup> Gustavo  
7 Matute-Bello,<sup>1</sup> and Michael H. Gelb<sup>3,4</sup>

8  
9 From the Department of Medicine, Division of <sup>1</sup>Pulmonary and Critical Care (TSH, YL, WAA,  
10 GMB), the <sup>2</sup>Molecular and Cellular Biology Program (KAH), the Departments of <sup>3</sup>Chemistry  
11 (RCO, MHG) and <sup>4</sup>Biochemistry (MHG), University of Washington, Seattle, WA.

## 14 **Supplemental Results**

15 *Eosinophil-like cell lines do not serve as an adequate model for sPLA<sub>2</sub>-X function.*

16 We differentiated HL-60-C15 cells with the HDAC inhibitor sodium butyrate (SB, 0.5 mM)  
17 for 7 days and found that the morphology of the cells attained characteristics of mature  
18 eosinophils, including an increase in the ability to synthesize CysLTs in response to fMLP (**Fig**  
19 **E3A**,  $P=0.003$ ). In such differentiated HL-60-C15 cells the effect of the sPLA<sub>2</sub>-X inhibitor was  
20 modest as opposed to the effects identified in primary human eosinophils (**Fig E3B**,  $P=0.04$ ).  
21 Further investigation of the effects of the HDAC inhibitor in these cells revealed that the HDAC  
22 inhibitor markedly suppressed the gene expression of *PLA2G10* (**Fig E3C**,  $P=0.001$ ).

23 Because HL-60-C15 cells require the HDAC inhibitor to attain a mature morphology, we  
24 also evaluated the potential use of the AML14.3D10-CCR3 eosinophil-like cell line. We found  
25 that the gene expression of *PLA2G10* was much lower in either undifferentiated HL-60-C15 cells  
26 or AML14.3D10-CCR3 relative to primary human epithelial cells (**Fig E3D**). Kwatia et al further  
27 corroborate these findings of differences in the level of expression in primary eosinophils and  
28 the AML14.3D10 cell line (6). We further validated these findings with a western blot of cell  
29 lysates from primary human eosinophils, undifferentiated HL-60-C15 cells and AML14.3D10-  
30 CCR3 cells in addition to recombinant version of the sPLA<sub>2</sub>-X pro-enzyme and the mature sPLA<sub>2</sub>-  
31 X enzyme (**Fig E3D**). The results show that there is significantly more sPLA<sub>2</sub>-X protein in primary  
32 human eosinophils, than in either of the two cell lines tested. Further, there is a gel shift in the  
33 protein suggesting that there are post-translational modifications of the protein structure, as  
34 we have seen in prior studies (2,7). In our experience, the *PLA2G10* expression in these cells is  
35 not sufficient to serve as an adequate target for shRNA studies. These results indicate that

36 eosinophil-like cell lines do not serve as an adequate model for further examining the  
37 mechanism of sPLA<sub>2</sub>-X mediated regulation of leukotriene synthesis that occurs in primary cells.

38 We also evaluated the ability to maintain primary human eosinophils in culture in the  
39 laboratory over a prolonged period of time to conduct siRNA studies. We found that after 24  
40 hours in cell culture, primary eosinophils lose the capacity for strong fMLP-mediated eicosanoid  
41 generation either with or without the addition of fetal calf serum (FCS) to the medium (**Fig E4**).  
42 *sPLA<sub>2</sub>-X may be secreted during eosinophil activation.*

43 As we found that sPLA<sub>2</sub>-X resides at least in part in the secretory apparatus of  
44 eosinophils, and it is known that the ROC-0929 inhibitor is not readily cell permeable (1), we  
45 examined whether sPLA<sub>2</sub>-X is secreted during activation. We found that the sPLA<sub>2</sub>-X protein  
46 could be identified in the supernatant of eosinophils, but the level is low based on western blot  
47 and there was no apparent difference in the amount of sPLA<sub>2</sub>-X in the eosinophil supernatant  
48 with activation (**Fig E6A**). One checkpoint in the activation of sPLA<sub>2</sub>-X is the cleavage of a pro-  
49 peptide that occurs at a furin consensus sequence (2,3). We found that a competitive inhibitor  
50 of furin-like propeptide convertases that acts intracellularly or extracellularly as a substrate  
51 mimic (6-D-R) (4) inhibited fMLP-mediated LTC<sub>4</sub> formation in the same range of magnitude as  
52 the cell impermeant ROC-0929 sPLA<sub>2</sub>-X inhibitor (**Fig E6B**). In contrast an irreversible pro-  
53 peptide convertase inactivator (D-RVKR-CMK) (5) did not alter LTC<sub>4</sub> formation. Although these  
54 results are not definitive, they suggest that the sPLA<sub>2</sub>-X enzyme is secreted during activation,  
55 and that it may be activated by proteolytic cleavage prior to secretion.

56

57

58 **Supplemental Figure Legends:**

59 **Figure E1.** Localization of sPLA<sub>2</sub>-X in unstimulated human eosinophils by confocal microscopy.

60 Immunostaining was used to co-localize the sPLA<sub>2</sub>-X (red) immunostaining to the endoplasmic  
61 reticulum (ER, anti-PDI), golgi (anti-GM130), granules (anti-EPX) and lipid bodies (anti-ADRP), all  
62 in green. In unstimulated eosinophils, sPLA<sub>2</sub>-X co-localized predominantly to the endoplasmic  
63 reticulum (ER) and golgi (first and second panels).

64

65 **Figure E2.** Localization of sPLA<sub>2</sub>-X in fMLP stimulated human eosinophils by confocal

66 microscopy. Immunostaining was used to co-localize sPLA<sub>2</sub>-X immunostaining to other

67 structures as outlined in Figure E1. Following fMLP stimulation, there was an increase in

68 colocalization to the ER and granules, and formation of lipid bodies that have immunostaining

69 for sPLA<sub>2</sub>-X. Arrows in the figure delineate sPLA<sub>2</sub>-X immunostaining (red) within structures that

70 clearly immunostain with markers for granules (anti-EPX in green, third panel down) and lipid

71 bodies (anti-ADRP in green, lower panel). Some of the lipid bodies containing sPLA<sub>2</sub>-X appear

72 extracellular.

73

74 **Figure E3.** Characterization of *PLA2G10* in primary eosinophils and eosinophil-like cell lines. A,

75 Differentiation of HL-60-C15 cells with the HDAC inhibitor sodium butyrate increased the ability

76 of these cells to synthesize CysLTs in response to fMLP. B, The effect of the sPLA<sub>2</sub>-X inhibitor

77 was modest in these cells in contrast to the effects of the cPLA<sub>2</sub>α inhibitor Pyr-2. C, The HDAC

78 inhibitor markedly suppressed the gene expression of *PLA2G10* in HL-60-C15 cells. D,

79 Comparison of the expression of *PLA2G10* in primary eosinophils demonstrates that while

80 primary eosinophils strongly express *PLA2G10*, undifferentiated HL-60-C15 cells and  
81 AML14.3D10-CCR3 cells have extremely low expression of *PLA2G10*. E, A western blot with  
82 recombinant human sPLA<sub>2</sub>-X zymogen and mature enzyme demonstrates that there is more  
83 sPLA<sub>2</sub>-X protein in primary human eosinophils relative to undifferentiated HL-60-C15 cells and  
84 AML14.3D10-CCR3 cells. In this blot, the endogenous enzyme has a gel shift from the  
85 recombinant protein, and there is also a band that may represent a dimer of both the  
86 recombinant protein and the native protein.

87

88 **Figure E4.** Effects of prolonged cell culture on the ability to activate primary eosinophils. In  
89 freshly isolated eosinophils, there is a marked increase in LTC<sub>4</sub> production in response to fMLP  
90 (100 nM) 20 minutes after treatment with fMLP. In contrast, following 24 hours of cell culture  
91 in RPMI with or without FCS, eosinophils failed to generate LTC<sub>4</sub> following the same fMLP  
92 stimulus.

93

94 **Figure E5.** Effect of the sPLA<sub>2</sub>-X inhibitor on the translocation of cPLA<sub>2</sub> and 5-LO in response to  
95 fMLP. Eosinophils were allowed to adhere to BSA coated cover slips and treated with vehicle  
96 alone (unstimulated), fMLP or fMLP with the sPLA<sub>2</sub>-X inhibitor 0929. A, Immunostaining for 5-  
97 LO (upper panel) and cPLA<sub>2</sub>α (lower panel) changes from faint and diffuse to more focal staining  
98 in peri-nuclear spaces and focal intracytoplasmic locations. The changes in 5-LO and cPLA<sub>2</sub>α  
99 were attenuated by pre-treatment of the eosinophils with the sPLA<sub>2</sub>-X inhibitor 0929.

100

101 **Figure E6.** Effects of furin-like propeptide convertase inhibitors on LTC<sub>4</sub> synthesis. A, The sPLA<sub>2</sub>-  
102 X protein appears predominantly as a single band that runs in the location of the mature  
103 protein after cleavage of the propeptide in both the supernatant (Sup) and cell lysates (Lys) of  
104 eosinophils. The concentration in the supernatant was low, and changes with fMLP stimulation  
105 were not apparent. B, Pre-treatment with a competitive inhibitor of furin-like propeptide  
106 convertase (6-D-R) inhibited the formation of LTC<sub>4</sub> to a similar amount as the sPLA<sub>2</sub>-X inhibitor.  
107 In contrast, the irreversible furin-like propeptide convertase inactivator (6-RVKR-CMK) did not  
108 attenuate LTC<sub>4</sub> formation.  
109  
110

**Supplemental Table I:** Selectivity of sPLA<sub>2</sub>-X inhibitor (ROC-0929) and structurally similar control inhibitor (ROC-0428), a non-selective sPLA<sub>2</sub> inhibitor (0509A) and an inhibitor predominantly active against group II sPLA<sub>2</sub>s (0320) for the 9 mammalian sPLA<sub>2</sub>s [IC<sub>50</sub> (nM)\*].

| sPLA <sub>2</sub> | Inhibitor |          |       |       |
|-------------------|-----------|----------|-------|-------|
|                   | ROC-0929  | ROC-0428 | 0509A | 0320  |
| hGIB              | >1600     | nd       | 80±3  | >1600 |
| hGIIA             | >1600     | nd       | 40±2  | 35±2  |
| hGIID**           | 700±230   | nd       | 7±3   | >1300 |
| hGIIE             | >1600     | nd       | 7±2   | 50±10 |
| hGIIF             | >1600     | nd       | 50±3  | >1600 |
| hGIII             | >1600     | nd       | >1600 | >1600 |
| hGV               | >1600     | nd       | 35±7  | >1600 |
| hGX               | 20±10     | 6600±900 | 20±3  | >1600 |
| hGXIIA            | >1600     | nd       | >1600 | >1600 |

\*IC<sub>50</sub> values obtained using fluorometric assay with pyrene-labeled phosphatidylglycerol as substrate.

\*\*IC<sub>50</sub> value obtained using radiolabeled *E. coli* membrane assay.

111

112

113 **Supplemental References:**

- 114 1. Mounier, C. M., Ghomashchi, F., Lindsay, M. R., James, S., Singer, A. G., Parton, R. G.,  
115 and Gelb, M. H. (2004) Arachidonic acid release from mammalian cells transfected with  
116 human groups IIA and X secreted phospholipase A<sub>2</sub> occurs predominantly during the  
117 secretory process and with the involvement of cytosolic phospholipase A<sub>2</sub>-α. *J Biol Chem*  
118 **279**, 25024-25038
- 119 2. Jemel, I., Li, H., Oslund, R. C., Payre, C., Dabert-Gay, A. S., Douguet, D., Chargui, K.,  
120 Scarzello, S., Gelb, M. H., and Lambeau, G. (2011) Group X secreted phospholipase A<sub>2</sub>  
121 proenzyme is matured by a furin-like proprotein convertase and releases arachidonic  
122 acid inside of human HEK293 cells. *J Biol Chem* **286**, 36509-36521
- 123 3. Ohtsuki, M., Taketomi, Y., Arata, S., Masuda, S., Ishikawa, Y., Ishii, T., Takanezawa, Y.,  
124 Aoki, J., Arai, H., Yamamoto, K., Kudo, I., and Murakami, M. (2006) Transgenic  
125 expression of group V, but not group X, secreted phospholipase A<sub>2</sub> in mice leads to  
126 neonatal lethality because of lung dysfunction. *J Biol Chem* **281**, 36420-36433
- 127 4. Peinado, J. R., Kacprzak, M. M., Leppla, S. H., and Lindberg, I. (2004) Cross-inhibition  
128 between furin and lethal factor inhibitors. *Biochem Biophys Res Commun* **321**, 601-605
- 129 5. Garten, W., Hallenberger, S., Ortmann, D., Schafer, W., Vey, M., Angliker, H., Shaw, E.,  
130 and Klenk, H. D. (1994) Processing of viral glycoproteins by the subtilisin-like  
131 endoprotease furin and its inhibition by specific peptidylchloroalkylketones. *Biochimie*  
132 **76**, 217-225



- 133 6. Kwatia, M. A., Doyle, C. B., Cho, W., Enhorning, G., and Ackerman, S. J. (2007) Combined  
134 activities of secretory phospholipases and eosinophil lysophospholipases induce  
135 pulmonary surfactant dysfunction by phospholipid hydrolysis. *J Allergy Clin Immunol*  
136 **119**, 838-847
- 137 7. Hallstrand, T. S., Chi, E. Y., Singer, A. G., Gelb, M. H., and Henderson, W. R., Jr. (2007)  
138 Secreted phospholipase A<sub>2</sub> group X overexpression in asthma and bronchial  
139 hyperresponsiveness. *Am J Respir Crit Care Med* **176**, 1072-1078  
140

sPLA<sub>2</sub>-X

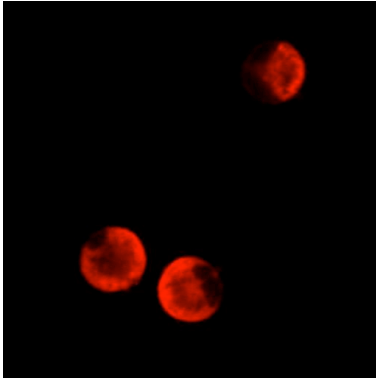

Endoplasmic Reticulum

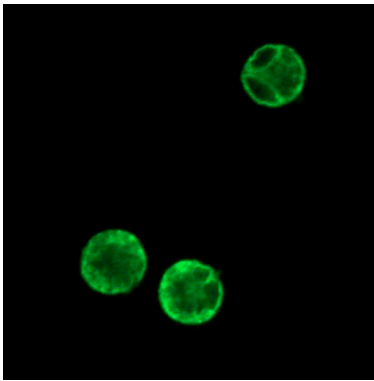

Merge

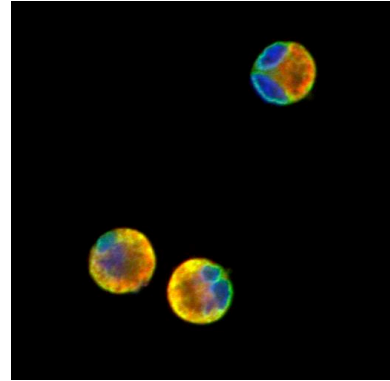

sPLA<sub>2</sub>-X

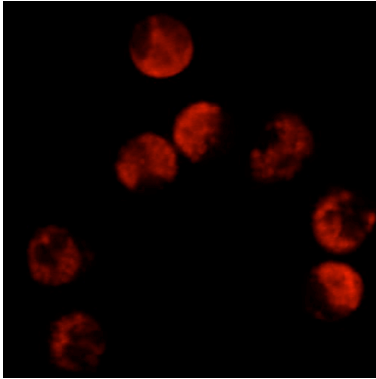

Golgi

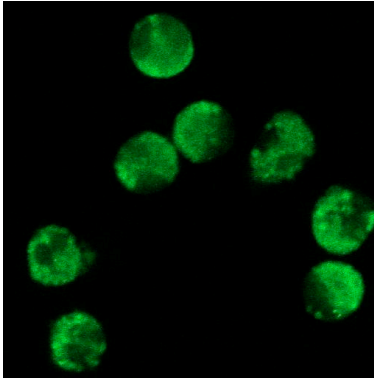

Merge

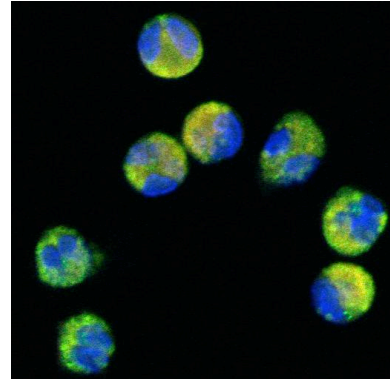

sPLA<sub>2</sub>-X

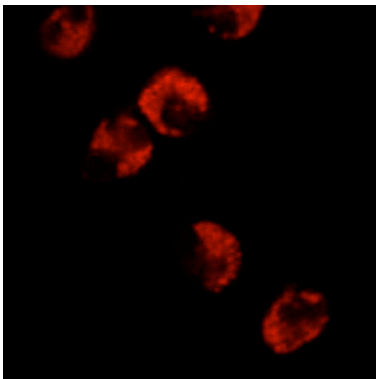

Eosinophil Granules

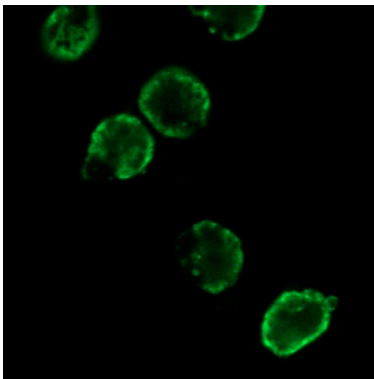

Merge

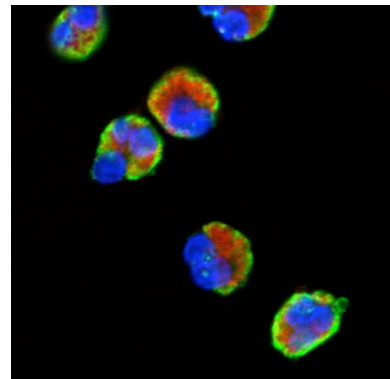

sPLA<sub>2</sub>-X

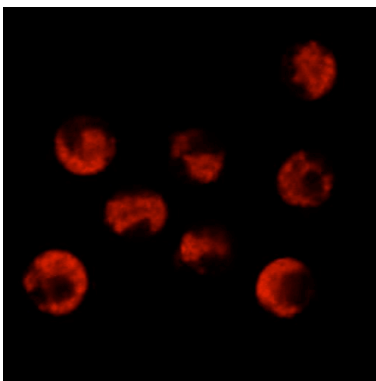

Lipid Bodies

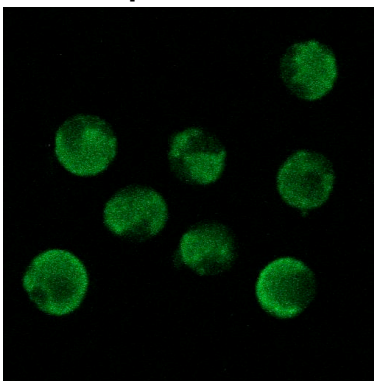

Merge

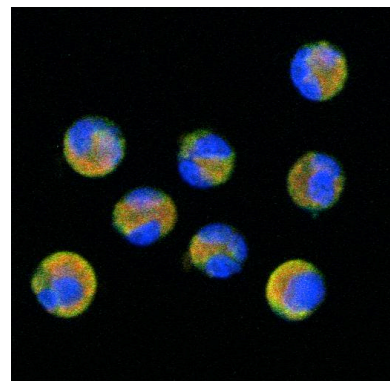

**sPLA<sub>2</sub>-X**

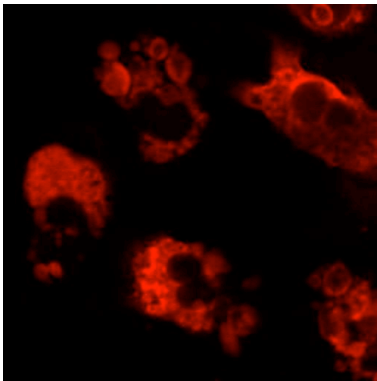

**Endoplasmic Reticulum**

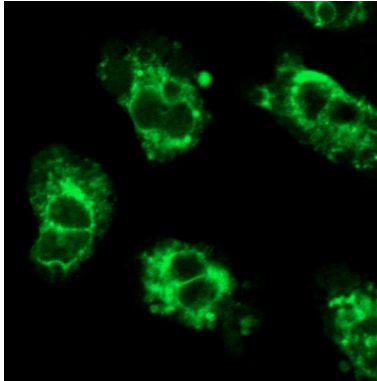

**Merge**

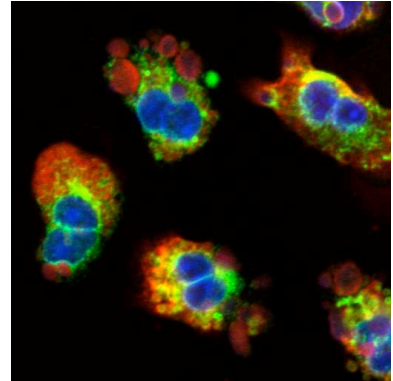

**sPLA<sub>2</sub>-X**

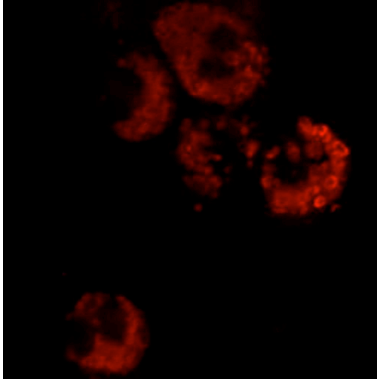

**Golgi**

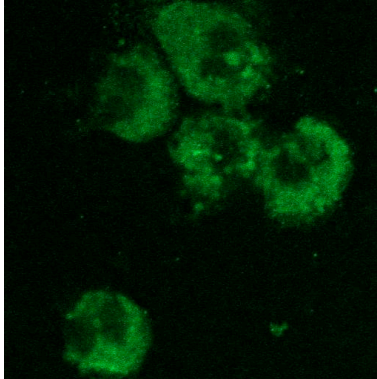

**Merge**

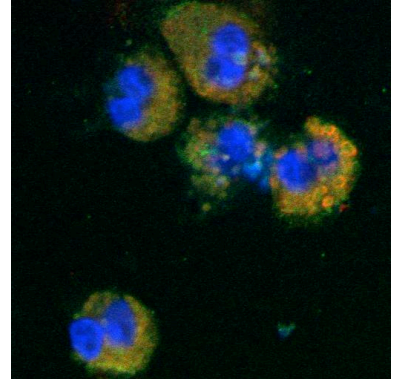

**sPLA<sub>2</sub>-X**

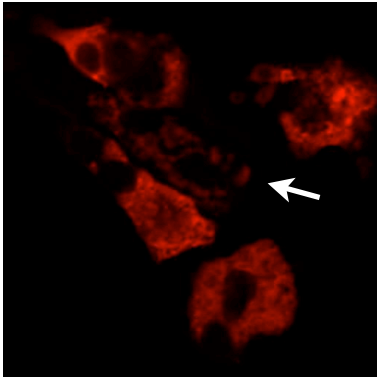

**Eosinophil Granules**

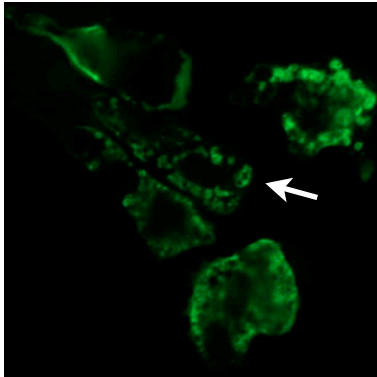

**Merge**

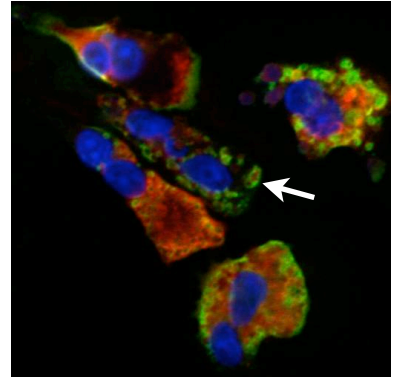

**sPLA<sub>2</sub>-X**

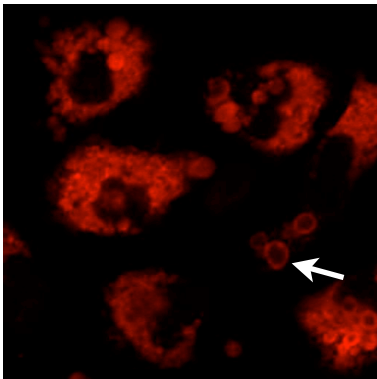

**Lipid Bodies**

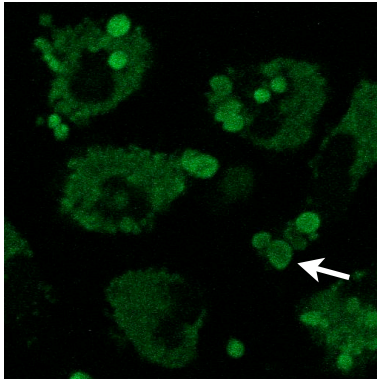

**Merge**

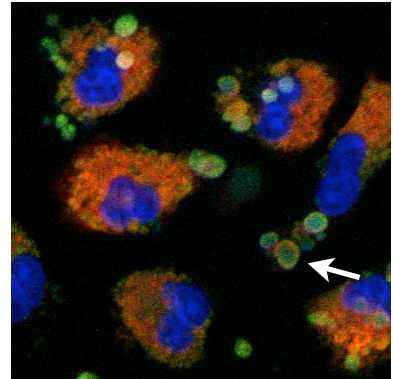

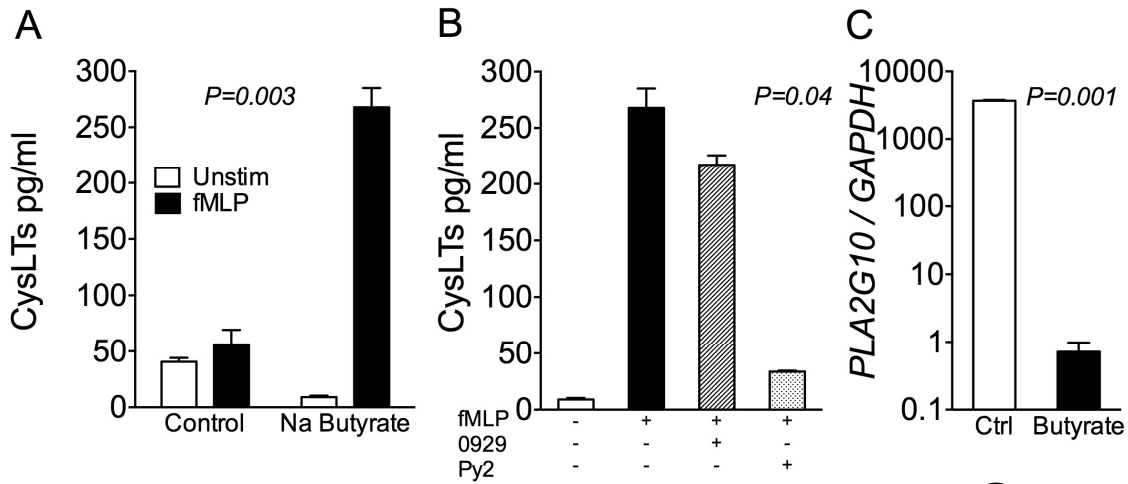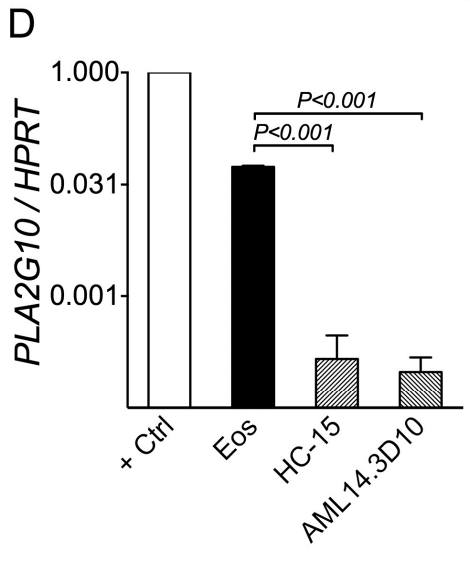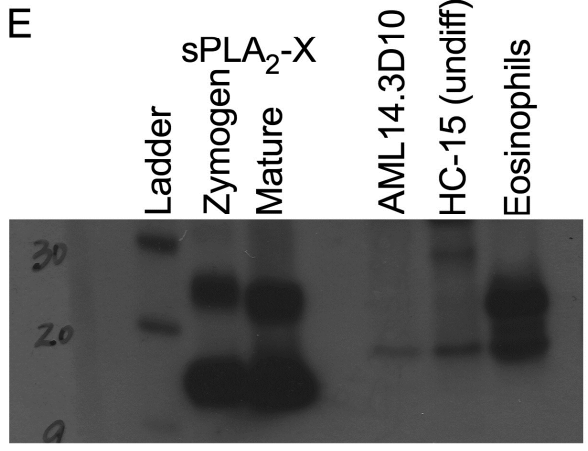

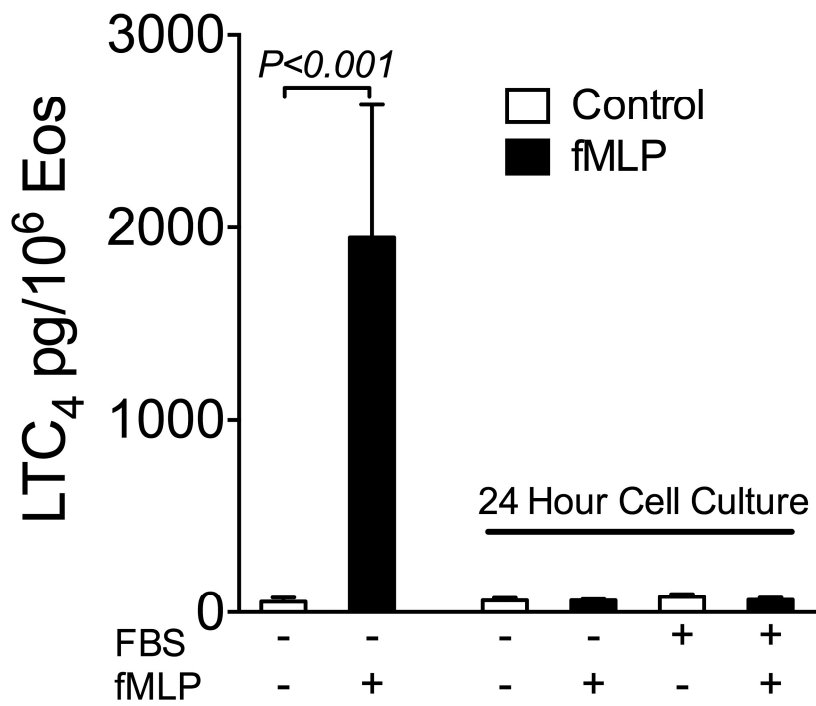

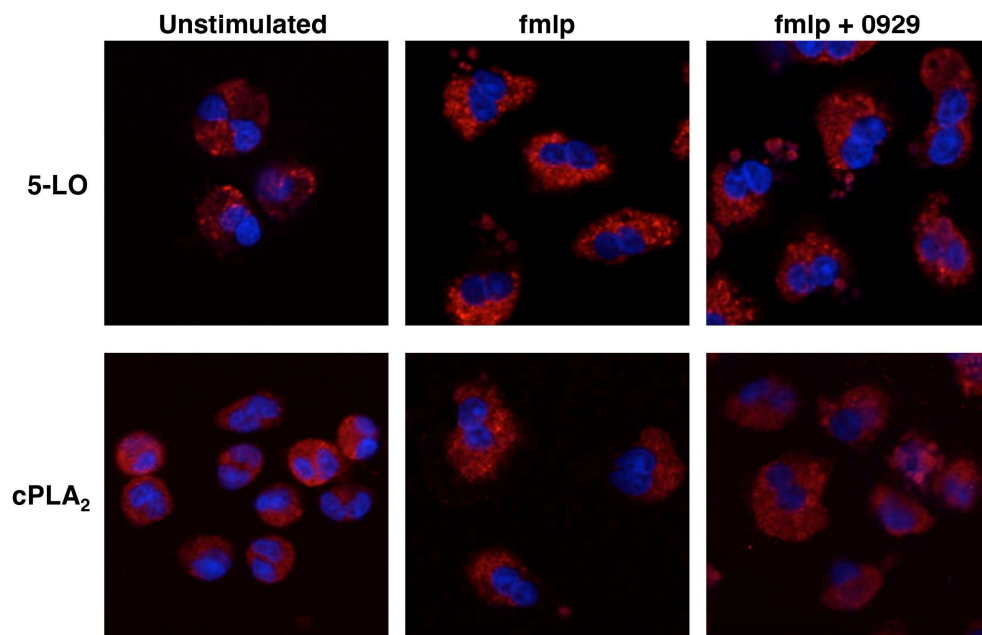

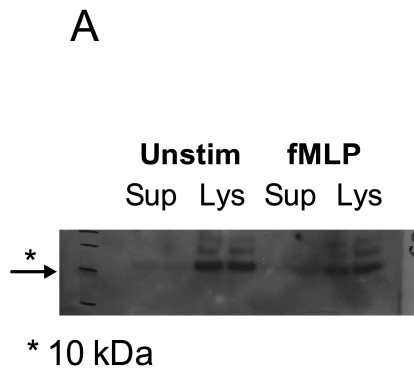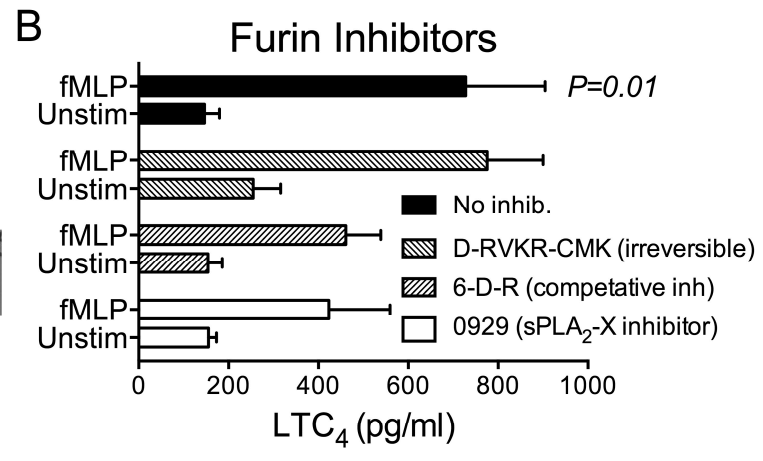

Supplement: NIHMS696734-supplement-supplement_1.pdf [file NIHMS696734-supplement-supplement_1.pdf]
